# Supplementary material
Source: PubMed Central journal article supplement (PMC420105)

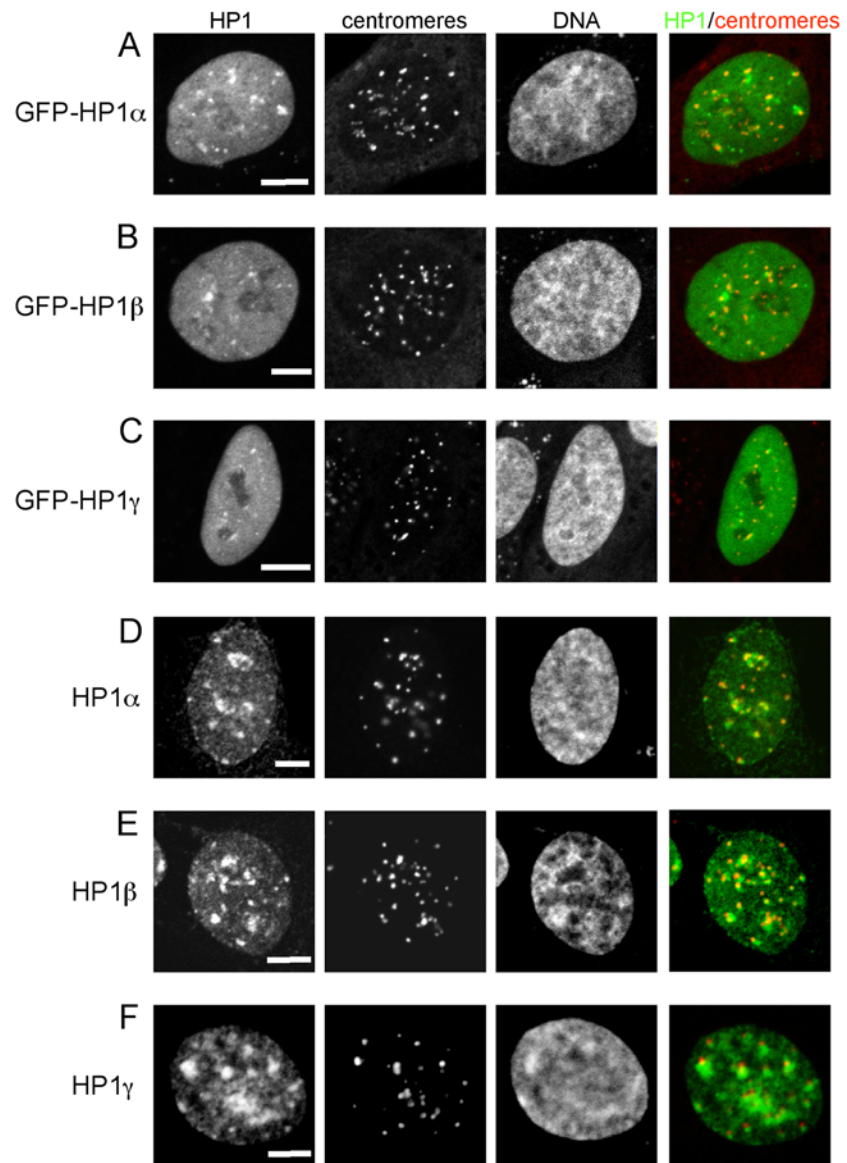

Supplement: mbc_15_6_2819__1.pdf [file mbc_15_6_2819__1.pdf]
